# Supplementary material for: Structural characteristics, cation distribution, and elastic properties of Cr3+ substituted stoichiometric and non-stoichiometric cobalt ferrites
Source: Royal Society of Chemistry journal article supplement (doi:10.1039/d1ra09090a), 2022-01-01
Supplement: d1ra09090a1.pdf [file d1ra09090a1.pdf]

## Appendix-A

### Equations belonging to section 3:

Equation for theoretical lattice parameter [1]:

$$a_{th} = \frac{8}{3\sqrt{3}}[(r_{tet} + R_O) + \sqrt{3}(r_{oct} + R_O)] \dots\dots\dots \text{(A1)}$$

Where  $R_O$  ( $=1.32\text{\AA}$ ) is the ionic radius of Oxygen.

The N-R function is as follows [17]:

$$F(\theta) = \left[ \frac{1}{2} \left( \frac{\cos^2 \theta}{\sin \theta} + \frac{\cos^2 \theta}{\theta} \right) \right] \dots\dots\dots \text{(A2)}$$

The lattice parameter for each Bragg position [30]:

$$a_{hkl} = d_{hkl} \sqrt{h^2 + k^2 + l^2} \dots\dots\dots \text{(A3)}$$

Here,  $a_{hkl}$ ,  $d_{hkl}$  are the lattice constant and interplanar spacing respectively.

Equations for bulk density  $d_B$  and X-ray density  $d_x$  [32]

$$d_B = \frac{m}{V_{geo}} = \frac{m}{\pi \left(\frac{d}{2}\right)^2 \times t} \dots\dots\dots \text{(A4)}$$

$$d_x = \frac{8M}{N_A a_{exp}^3} \dots\dots\dots \text{(A5)}$$

Equation for porosity [8]:

$$\%P = \left( 1 - \frac{d_B}{d_x} \right) \times 100 \dots\dots\dots \text{(A6)}$$

Where  $M$  is the molecular mass calculated from molecular formulae,  $a_{exp}$  is the experimental lattice constant and  $N_A$  ( $= 6.02 \times 10^{23}$ ) is Avogadro's number.

Equation for oxygen positional parameter u [1]:

$$u = \left[ \left( \frac{r_{tet} + R_O}{\sqrt{3}a} \right) + 0.25 \right] \dots\dots\dots (\text{A7})$$

Stanley's equations [1]:

$$L_A = \frac{a\sqrt{3}}{4}, \text{ and } L_B = \frac{a\sqrt{2}}{4} \dots\dots\dots (\text{A8})$$

The equations for tetrahedral and octahedral bond lengths ( $d_{AL}$ ) and ( $d_{BL}$ ), tetrahedral edge length ( $d_{AE}$ ), and shared ( $d_{BE}$ ) and un-shared octahedral edge lengths ( $d_{BEU}$ ) are as follows [1]:

$$d_{AL} = a\sqrt{3}(u - 0.25) \dots\dots\dots (\text{A9})$$

$$d_{BL} = a \sqrt{3u^2 - \frac{11}{4}u + \frac{43}{64}} \dots\dots\dots (\text{A10})$$

$$d_{AE} = a\sqrt{2}(2u - 0.5) \dots\dots\dots (\text{A11})$$

$$d_{BE} = a\sqrt{2}(1 - 2u) \dots\dots\dots (\text{A12})$$

$$d_{BAU} = a \sqrt{4u^2 - 3u + \frac{11}{16}} \dots\dots\dots (\text{A13})$$

Equations for various bond length and bond angles [1]:

Me-Me distances

$$b = \frac{a\sqrt{2}}{4} \dots\dots\dots (\text{A14})$$

$$c = \frac{a\sqrt{11}}{8} \dots\dots\dots (\text{A15})$$

$$d = \frac{a\sqrt{3}}{4} \dots\dots\dots (\text{A16})$$

$$e = \frac{3\sqrt{3}a}{8} \dots\dots\dots (\text{A17})$$

$$f = \frac{a\sqrt{6}}{4} \dots\dots\dots (\text{A18})$$

Me-O distances

$$p = a\left(\frac{5}{8} - u\right) \dots \dots \dots \quad (\text{A19})$$

$$q = a\sqrt{3}\left(u - \frac{1}{4}\right) \dots \dots \dots \quad (\text{A20})$$

$$r = \frac{a\sqrt{11}u}{4} \dots \dots \dots \quad (\text{A21})$$

$$s = a\sqrt{3}\left(\frac{u}{3} + \frac{1}{8}\right) \dots \dots \dots \quad (\text{A22})$$

Bond angles

$$\theta_1 = \cos^{-1}\left(\frac{p^2 + q^2 - c^2}{2pq}\right) \dots \dots \dots \quad (\text{A23})$$

$$\theta_2 = \cos^{-1}\left(\frac{p^2 + r^2 - e^2}{2pr}\right) \dots \dots \dots \quad (\text{A24})$$

$$\theta_3 = \cos^{-1}\left(\frac{p^2 - b^2}{2p^2}\right) \dots \dots \dots \quad (\text{A25})$$

$$\theta_4 = \cos^{-1}\left(\frac{p^2 + s^2 - f^2}{2ps}\right) \dots \dots \dots \quad (\text{A26})$$

$$\theta_5 = \cos^{-1}\left(\frac{r^2 + q^2 - d^2}{2qr}\right) \dots \dots \dots \quad (\text{A27})$$

Equations for the ionic packing coefficient  $P_{tet}$  and  $P_{oct}$  at the tetrahedral and octahedral sites [34]:

$$P_{tet} = \frac{R_{tet} - R_o}{r_{tet}} \dots \dots \dots \quad (\text{A28})$$

$$P_{oct} = \frac{R_{oct} - R_o}{r_{oct}} \dots \dots \dots \quad (\text{A29})$$

Here,  $R_{tet}(=d_{AL})$  and  $R_{oct}(=d_{BL})$  are the average bond length at tetrahedral and octahedral sites respectively.

Equation for the fulfillment coefficient ( $\alpha$ ) of the unit cell using the following relation [34]:

$$\alpha = \frac{32\pi(r_{tet}^3 + 2r_{oct}^3 + 4R_o^3)}{3a_{exp}^3} \dots \dots \dots \quad (\text{A30})$$

Equation of vacancy parameter  $\beta$  [34]:

$$\beta = \frac{a_{th}^3 - a_{exp}^3}{a_{th}^3} \times 100\% \dots \dots \dots \quad (\text{A31})$$

Equation for tolerance factor calculation [36]:

$$T = \frac{1}{\sqrt{3}} \left[ \frac{r_{tet} + R_O}{r_{oct} + R_O} \right] + \frac{1}{\sqrt{2}} \left[ \frac{R_O}{r_{tet} + R_O} \right] \dots \dots \dots \quad (\text{A32})$$

The FWHM data has been calculated by using the following relation [37]:

$$\beta_o = 0.5346 \times W_L + \sqrt{0.2166W_L^2 + W_G^2} \dots \dots \dots \quad (\text{A33})$$

Here,  $\beta_o$  is observed FWHM,  $W_L$  and  $W_G$  is the Lorentzian and Gaussian width respectively. The instrumental broadening ( $\beta_i$ ) removal equation [34]:

$$\beta_{hkl} = [(\beta_o - \beta_i)(\beta_o^2 - \beta_i^2)^{0.5}]^{0.5} \dots \dots \dots \quad (\text{A34})$$

The Scherrer equation [17]:

$$D = \frac{0.9\lambda}{\beta_{311} \cos \theta} \dots \dots \dots \quad (\text{A35})$$

Here,  $\beta_{311}$  is the FWHM at (311) plane (most intense peak),  $\lambda$  (=1.5406 Å) represents the wavelength of incident X-rays.

Modified Scherrer equation [22]:

$$\ln \beta = \ln \left( \frac{0.9\lambda}{D} \right) + \ln \left( \frac{1}{\cos \theta} \right) \dots \dots \dots \quad (\text{A36})$$

Williamson–Hall relation [14, 21]:

$$\beta_{tot} = \beta_{strain} + \beta_{crystal} = 4\epsilon \tan \theta + \frac{0.9\lambda}{D \cos \theta}$$

Or,  $\beta_{hkl} \cos \theta = 4\epsilon \sin \theta + \frac{0.9\lambda}{D} \dots \dots \dots \quad (\text{A37})$

Here,  $\beta_{hkl}$  is the total broadening due to strain and size in a particular peak having the (hkl) value which is written exchange of  $\beta_{tot}$ .

Equation for the size strain plot [21]:

$$(d_{hkl} \cdot \beta_{hkl} \cdot \cos\theta)^2 = \frac{K\lambda}{D} (d_{hkl}^2 \beta_{hkl} \cdot \cos\theta) + \frac{\varepsilon^2}{4} \dots \dots \dots \quad (\text{A38})$$

Here,  $d_{hkl}$  is lattice spacing for different (hkl) planes.

Force constant according to Waldron relation [21]:

$$k_t = 4\pi^2 c^2 \nu_1^2 \mu \dots \dots \dots \quad (\text{A39})$$

$$k_o = 4\pi^2 c^2 \nu_2^2 \mu \dots \dots \dots \quad (\text{A40})$$

$$k_{av} = (k_t + k_o)/2 \dots \dots \dots \quad (\text{A41})$$

Here, c is the velocity of light,  $\mu$  is the reduced mass which we have calculated by the following relation [38, 39]:

$$\mu = \frac{m_1 * m_2}{m_1 + m_2} \dots \dots \dots \quad (\text{A42})$$

Where  $m_1$  is the weighted average of atomic weights of the cations residing at the A-site or B-site while  $m_2$  is the atomic weight of oxygen anion.

Equation for the stiffness constant  $C_{11}$ ,  $C_{12}$  [21]:

$$C_{11} = \frac{k_{av}}{a} \dots \dots \dots \quad (\text{A43})$$

$$C_{12} = \frac{\sigma C_{11}}{1 - \sigma} \dots \dots \dots \quad (\text{A44})$$

Here,  $\sigma$  is the Poisson's ratio as a function of pore fraction P. The corresponding relation for  $\sigma$  is as follows [21]:

$$\sigma = 0.324(1 - 1.043P) \dots \dots \dots \quad (\text{A45})$$

Some elastic properties related equations [40, 41]:

Bulk modulus:

$$B = \frac{1}{3}(C_{11} + 2C_{12}) \dots \dots \dots \quad (\text{A46})$$

Longitudinal wave velocity,

$$v_l = \sqrt{\frac{C_{11}}{d_x}}, \dots \dots \dots \quad (\text{A47})$$

Here,  $d_x$  is the X-ray density

Transverse wave velocity,

$$v_t = \frac{v_l}{\sqrt{3}} \dots \dots \dots \quad (\text{A48})$$

Rigidity modulus,

$$G = d_x v_t^2 \dots \dots \dots \quad (\text{A49})$$

Young's modulus,

$$E = 2(1 + \sigma)G \dots \dots \dots \quad (\text{A50})$$

Mean velocity,

$$v_m = \left( \frac{1}{3} \left( \frac{2}{v_t^3} + \frac{1}{v_l^3} \right) \right)^{-1/3} \dots \dots \dots \quad (\text{A51})$$

Hasselmann and Fularth's formulae for the corrected zero porosity elastic moduli [41, 21]:

$$\frac{1}{E_o} = \frac{1}{E} \left[ 1 - \frac{3p(1 - \sigma)(9 + 5\sigma)}{2(7 - 5\sigma)} \right] \dots \dots \dots \quad (\text{A52})$$

$$\frac{1}{G_o} = \frac{1}{G} \left[ 1 - \frac{15p(1 - \sigma)}{7 - 5\sigma} \right] \dots \dots \dots \quad (\text{A53})$$

$$B_o = \left[ \frac{E_o G_o}{3(3G_o - E_o)} \right] \dots \dots \dots \quad (\text{A54})$$

$$\sigma_o = \left( \frac{E_o}{2G_o} \right) - 1 \dots \dots \dots \quad (\text{A55})$$

Anderson's formula for the Debye temperature,  $\theta_D$  [44]:

$$\theta_D = \frac{h}{k_B} \left( \frac{3qd_x N_A}{4\pi M} \right)^{\frac{1}{3}} v_m \dots \dots \dots \quad (\text{A56})$$

Where  $h$  is Planck's constant,  $k_B$  is Boltzmann's constant,  $N_A$  is Avogadro's number,  $d_x$  is the density,  $M$  is the molecular mass, and  $q$  is the number of atoms per unit formula.

Equations for thermal conductivity [38]:

$$K_{min} = k_B v_m \left( \frac{M}{q d_x N_A} \right)^{-2/3} \dots \dots \dots \quad (\text{A57})$$

## Appendix B

**Table-B1.** Possible cation distribution for all samples of series S1(Co<sub>1-x</sub>Cr<sub>x</sub>Fe<sub>2</sub>O<sub>4</sub>) and S2 (Co<sub>1+x</sub>Cr<sub>x</sub>Fe<sub>2-x</sub>O<sub>4</sub>).

| Series →                       |                                        | S1    |       |       |       |       | S2    |       |       |       |
|--------------------------------|----------------------------------------|-------|-------|-------|-------|-------|-------|-------|-------|-------|
| x →                            |                                        | 0.000 | 0.125 | 0.250 | 0.375 | 0.500 | 0.125 | 0.250 | 0.375 | 0.500 |
| <b>Tetrahedral Site (± 2%)</b> | <b>Co</b>                              | 0.132 | 0.100 | 0.090 | 0.070 | 0.050 | 0.179 | 0.121 | 0.042 | 0.012 |
|                                | <b>Cr</b>                              | 0     | 0.057 | 0.110 | 0.166 | 0.232 | 0.011 | 0.012 | 0.018 | 0.008 |
|                                | <b>Fe</b>                              | 0.868 | 0.843 | 0.800 | 0.764 | 0.718 | 0.810 | 0.867 | 0.940 | 0.980 |
| <b>Octahedral Site (± 2%)</b>  | <b>Co</b>                              | 0.868 | 0.775 | 0.660 | 0.555 | 0.450 | 0.946 | 1.129 | 1.333 | 1.488 |
|                                | <b>Cr</b>                              | 0     | 0.068 | 0.140 | 0.209 | 0.268 | 0.114 | 0.238 | 0.357 | 0.492 |
|                                | <b>Fe</b>                              | 1.132 | 1.157 | 1.200 | 1.236 | 1.282 | 1.065 | 0.883 | 0.685 | 0.520 |
| <b>Calculated</b>              | <b>I<sub>400</sub>/I<sub>440</sub></b> | 0.77  | 0.76  | 0.81  | 0.81  | 0.83  | 0.83  | 0.85  | 0.80  | 0.80  |
|                                | <b>I<sub>220</sub>/I<sub>440</sub></b> | 0.98  | 0.82  | 1.11  | 1.05  | 1.06  | 1.14  | 1.08  | 1.05  | 0.80  |
| <b>Observed</b>                | <b>I<sub>400</sub>/I<sub>440</sub></b> | 0.74  | 0.75  | 0.72  | 0.76  | 0.78  | 0.84  | 0.90  | 0.78  | 0.77  |
|                                | <b>I<sub>220</sub>/I<sub>440</sub></b> | 1.03  | 1.03  | 1.10  | 1.02  | 1.01  | 1.25  | 1.24  | 1.00  | 1.04  |
| <b>Inversion parameter (y)</b> |                                        | 0.76  | 0.72  | 0.66  | 0.62  | 0.56  | 0.76  | 0.98  | 1.37  | 1.88  |
| <b>Ionic Radius (Å)</b>        | <b>r<sub>tet</sub></b>                 | 0.63  | 0.64  | 0.65  | 0.66  | 0.68  | 0.64  | 0.63  | 0.62  | 0.61  |
|                                | <b>r<sub>oct</sub></b>                 | 0.69  | 0.68  | 0.68  | 0.67  | 0.66  | 0.73  | 0.78  | 0.83  | 0.87  |

**Table-B2.** Lattice parameter, density, and porosity for all samples of series S1( $\text{Co}_{1-x}\text{Cr}_x\text{Fe}_2\text{O}_4$ ) and S2 ( $\text{Co}_{1+x}\text{Cr}_x\text{Fe}_{2-x}\text{O}_4$ ).

| Series    | x     | $a_{\text{exp}}$<br>(Å) | $V_{\text{exp}}$<br>(Å <sup>3</sup> ) | $a_{\text{true}}$<br>(Å) | $V_{\text{true}}$<br>(Å <sup>3</sup> ) | $a_{\text{th}}$<br>(Å) | $V_{\text{th}}$<br>(Å <sup>3</sup> ) | $d_x$<br>(g/cm <sup>3</sup> ) | $d_B$<br>(g/cm <sup>3</sup> ) | $d_{\text{reit}}$<br>(g/cm <sup>3</sup> ) | P(%) |
|-----------|-------|-------------------------|---------------------------------------|--------------------------|----------------------------------------|------------------------|--------------------------------------|-------------------------------|-------------------------------|-------------------------------------------|------|
| <b>S1</b> | 0     | 8.3492                  | 582.01                                | 8.3539                   | 582.45                                 | 8.3635                 | 585                                  | 5.36                          | 4.90                          | 5.34                                      | 9    |
|           | 0.125 | 8.3520                  | 582.6                                 | 8.3596                   | 579.51                                 | 8.3642                 | 585                                  | 5.33                          | 4.87                          | 5.33                                      | 9    |
|           | 0.250 | 8.3542                  | 583.06                                | 8.3600                   | 578.15                                 | 8.3647                 | 585                                  | 5.31                          | 4.78                          | 5.29                                      | 10   |
|           | 0.375 | 8.3644                  | 585.2                                 | 8.3672                   | 577.47                                 | 8.3658                 | 586                                  | 5.27                          | 4.69                          | 5.27                                      | 11   |
|           | 0.500 | 8.3765                  | 587.74                                | 8.3746                   | 576.55                                 | 8.3713                 | 587                                  | 5.31                          | 4.61                          | 5.22                                      | 13   |
| <b>S2</b> | 0.125 | 8.3556                  | 582.39                                | 8.3705                   | 586.48                                 | 8.4927                 | 613                                  | 5.52                          | 4.94                          | 5.52                                      | 11   |
|           | 0.250 | 8.3581                  | 589.32                                | 8.3896                   | 590.50                                 | 8.6096                 | 638                                  | 5.67                          | 5.00                          | 5.68                                      | 12   |
|           | 0.375 | 8.3649                  | 595.80                                | 8.3958                   | 591.81                                 | 8.7272                 | 665                                  | 5.82                          | 5.07                          | 5.85                                      | 13   |
|           | 0.500 | 8.376                   | 604.68                                | 8.4061                   | 593.99                                 | 8.8414                 | 691                                  | 5.95                          | 5.09                          | 6.01                                      | 15   |



**Table-B3.** Values of hopping lengths ( $L_A, L_B$ ), Tetrahedral bond length ( $d_{AL}$ ), octahedral bond lengths ( $d_{BL}$ ), tetrahedral edge length ( $d_{AE}$ ), shared and unshared octahedral edge ( $d_{BE}, d_{BEU}$ ), interatomic bond lengths and angles for all samples of series S1( $Co_{1-x}Cr_xFe_2O_4$ ) and S2 ( $Co_{1+x}Cr_xFe_{2-x}O_4$ ).

| Series →             |            | S1     |        |        |        |        | S2     |        |        |        |
|----------------------|------------|--------|--------|--------|--------|--------|--------|--------|--------|--------|
| x →                  |            | 0.000  | 0.125  | 0.250  | 0.375  | 0.500  | 0.125  | 0.250  | 0.375  | 0.500  |
| $L_A$ (Å)            |            | 3.623  | 3.622  | 3.617  | 3.616  | 3.614  | 3.667  | 3.717  | 3.768  | 3.809  |
| $L_B$ (Å)            |            | 2.958  | 2.957  | 2.953  | 2.952  | 2.951  | 2.994  | 3.035  | 3.077  | 3.11   |
| $d_{AL}$ (Å)         |            | 1.945  | 1.956  | 1.968  | 1.982  | 1.998  | 1.926  | 1.893  | 1.86   | 1.832  |
| $d_{BL}$ (Å)         |            | 2.011  | 2.006  | 2.000  | 1.996  | 1.993  | 2.023  | 2.042  | 2.063  | 2.083  |
| $d_{AE}$ (Å)         |            | 3.176  | 3.194  | 3.215  | 3.237  | 3.263  | 3.145  | 3.091  | 3.037  | 2.991  |
| $d_{BE}$ (Å)         |            | 2.727  | 2.711  | 2.692  | 2.677  | 2.659  | 2.762  | 2.818  | 2.877  | 2.931  |
| $d_{BEU}$ (Å)        |            | 2.956  | 2.958  | 2.959  | 2.964  | 2.969  | 2.957  | 2.956  | 2.958  | 2.961  |
| Me-Me distances (Å)  | b          | 2.9569 | 2.9572 | 2.9574 | 2.9577 | 2.9597 | 3.0026 | 3.0439 | 3.0855 | 3.1259 |
|                      | c          | 3.4673 | 3.4676 | 3.4678 | 3.4683 | 3.4705 | 3.5209 | 3.5693 | 3.6181 | 3.6654 |
|                      | d          | 3.6215 | 3.6218 | 3.6220 | 3.6225 | 3.6248 | 3.6774 | 3.7280 | 3.7789 | 3.8284 |
|                      | e          | 5.4322 | 5.4327 | 5.4330 | 5.4337 | 5.4373 | 5.5162 | 5.5921 | 5.6684 | 5.7426 |
|                      | f          | 5.1216 | 5.1220 | 5.1223 | 5.1230 | 5.1263 | 5.2007 | 5.2723 | 5.3442 | 5.4142 |
| Me-O distances (Å)   | p          | 2.0113 | 2.0056 | 1.9987 | 1.9923 | 1.9861 | 2.0543 | 2.1027 | 2.1523 | 2.1990 |
|                      | q          | 1.9484 | 1.9588 | 1.9712 | 1.9829 | 1.9973 | 1.9579 | 1.9500 | 1.9405 | 1.9337 |
|                      | r          | 3.7310 | 3.7508 | 3.7745 | 3.7970 | 3.8245 | 3.7491 | 3.7340 | 3.7158 | 3.7028 |
|                      | s          | 3.6674 | 3.6711 | 3.6754 | 3.6797 | 3.6865 | 3.7171 | 3.7567 | 3.7959 | 3.8349 |
| Bond Angles (degree) | $\theta_1$ | 122.23 | 122.00 | 121.74 | 121.49 | 121.21 | 122.67 | 123.41 | 124.17 | 124.85 |
|                      | $\theta_2$ | 140.27 | 139.39 | 138.35 | 137.40 | 136.35 | 142.08 | 145.27 | 148.86 | 152.38 |
|                      | $\theta_3$ | 94.62  | 94.98  | 95.43  | 95.85  | 96.33  | 93.90  | 92.73  | 91.58  | 90.58  |

|  |            |        |        |        |        |        |        |        |        |        |
|--|------------|--------|--------|--------|--------|--------|--------|--------|--------|--------|
|  | $\theta_4$ | 126.30 | 126.38 | 126.47 | 126.56 | 126.66 | 126.14 | 125.89 | 125.63 | 125.40 |
|  | $\theta_5$ | 71.54  | 70.98  | 70.31  | 69.68  | 68.99  | 72.70  | 74.68  | 76.80  | 78.75  |

**Table-B4.** Oxygen positional parameter, ionic packing coefficient, fulfillment coefficient, vacancy parameter, and tolerance factor for all samples of series S1( $\text{Co}_{1-x}\text{Cr}_x\text{Fe}_2\text{O}_4$ ) and S2 ( $\text{Co}_{1+x}\text{Cr}_x\text{Fe}_{2-x}\text{O}_4$ ).

| Series | x     | Oxygen Positional Parameter, u and Deviation, $\delta$ |          | Ionic Packing Coefficient |        | Fulfillment Coefficient $\alpha$ | Vacancy parameter $\beta$ | Tolerance factor T |
|--------|-------|--------------------------------------------------------|----------|---------------------------|--------|----------------------------------|---------------------------|--------------------|
|        |       | u                                                      | $\delta$ | $P_a$                     | $P_b$  |                                  |                           |                    |
| S1     | 0     | 0.3845                                                 | 0.0095   | 0.9867                    | 0.9967 | 0.5819                           | 0.5145                    | 1.038              |
|        | 0.125 | 0.3852                                                 | 0.0102   | 0.9877                    | 0.9982 | 0.5811                           | 0.4370                    | 1.040              |
|        | 0.250 | 0.3860                                                 | 0.0110   | 0.9884                    | 0.9988 | 0.5804                           | 0.3783                    | 1.043              |
|        | 0.375 | 0.3868                                                 | 0.0118   | 0.9919                    | 0.9991 | 0.5782                           | 0.0526                    | 1.045              |
|        | 0.500 | 0.3877                                                 | 0.0127   | 0.9944                    | 1.0008 | 0.5758                           | -0.1860                   | 1.048              |
| S2     | 0.125 | 0.3831                                                 | 0.0081   | 0.9426                    | 0.9589 | 0.5887                           | 4.7671                    | 1.027              |
|        | 0.250 | 0.3807                                                 | 0.0057   | 0.9016                    | 0.9239 | 0.5972                           | 8.5123                    | 1.014              |
|        | 0.375 | 0.3784                                                 | 0.0033   | 0.8621                    | 0.8940 | 0.6062                           | 11.9433                   | 1.000              |
|        | 0.500 | 0.3763                                                 | 0.0013   | 0.8259                    | 0.8692 | 0.6150                           | 14.9758                   | 0.990              |

**Table-B5.** Crystallite size (D) and strain ( $\epsilon$ ) estimated by different methods for all samples of series S1( $\text{Co}_{1-x}\text{Cr}_x\text{Fe}_2\text{O}_4$ ) and S2 ( $\text{Co}_{1+x}\text{Cr}_x\text{Fe}_{2-x}\text{O}_4$ ).

| Series | x     | Scherrer Method | Modified Scherrer Method | Rietveld refined Method |            | Williamson–Hall Method |            | Size Strain Method |                       |
|--------|-------|-----------------|--------------------------|-------------------------|------------|------------------------|------------|--------------------|-----------------------|
|        |       | D (nm)          | D (nm)                   | D (nm)                  | $\epsilon$ | D (nm)                 | $\epsilon$ | D (nm)             | $\epsilon$            |
| S1     | 0     | 46              | 53                       | 61                      | 0.00092    | 71                     | 0.000725   | 60                 | $1.41 \times 10^{-5}$ |
|        | 0.125 | 46              | 51                       | 57                      | 0.00085    | 70                     | 0.000746   | 52                 | $5.91 \times 10^{-6}$ |
|        | 0.250 | 45              | 49                       | 52                      | 0.00071    | 64                     | 0.000775   | 51                 | $9.3510^{-6}$         |
|        | 0.375 | 39              | 45                       | 51                      | 0.00058    | 60                     | 0.000909   | 50                 | $1.33 \times 10^{-5}$ |
|        | 0.500 | 39              | 43                       | 46                      | 0.00046    | 56                     | 0.000905   | 47                 | $1.40 \times 10^{-5}$ |
| S2     | 0.125 | 47              | 50                       | 59                      | 0.00075    | 67                     | 0.000786   | 58                 | $1.14 \times 10^{-5}$ |
|        | 0.250 | 40              | 43                       | 49                      | 0.00068    | 52                     | 0.000624   | 45                 | $5.94 \times 10^{-5}$ |
|        | 0.375 | 37              | 40                       | 41                      | 0.00051    | 43                     | 0.000374   | 42                 | $5.55 \times 10^{-6}$ |
|        | 0.500 | 39              | 39                       | 38                      | 0.00046    | 43                     | 0.000353   | 40                 | $2.21 \times 10^{-6}$ |

**Table-B6.** Absorbtion wave number ( $\nu_1, \nu_2$ ), force constant, stiffness constant, wave velocity, elastic constant, Pugh ratio, Poisson ratio Debye temperature, and minimum thermal constant for all samples of series S1( $\text{Co}_{1-x}\text{Cr}_x\text{Fe}_2\text{O}_4$ ) and S2 ( $\text{Co}_{1+x}\text{Cr}_x\text{Fe}_{2-x}\text{O}_4$ ).

| Series →                       |                           | S1   |       |       |       |       | S2    |       |       |       |
|--------------------------------|---------------------------|------|-------|-------|-------|-------|-------|-------|-------|-------|
| x →                            |                           | 0    | 0.125 | 0.250 | 0.375 | 0.500 | 0.125 | 0.250 | 0.375 | 0.500 |
| $\nu_1$ (cm <sup>-1</sup> )    |                           | 371  | 373   | 375   | 377   | 378   | 374   | 376   | 377   | 378   |
| $\nu_2$ (cm <sup>-1</sup> )    |                           | 554  | 558   | 564   | 568   | 572   | 586   | 590   | 594   | 598   |
| Force Constant                 | $k_t$ (N/m)               | 290  | 294   | 300   | 305   | 309   | 324   | 329   | 333   | 338   |
|                                | $k_o$ (N/m)               | 130  | 131   | 133   | 134   | 135   | 132   | 133   | 134   | 135   |
|                                | $k_{ab}$ (N/m)            | 210  | 213   | 217   | 219   | 222   | 228   | 231   | 234   | 236   |
| Stiffness Costant              | $C_{11}$ (GPa)            | 251  | 255   | 260   | 264   | 268   | 273   | 277   | 280   | 284   |
|                                | $C_{12}$ (GPa)            | 105  | 106   | 106   | 106   | 106   | 110   | 110   | 109   | 108   |
| Wave Velocity                  | $v_l$ (ms <sup>-2</sup> ) | 6843 | 6911  | 6999  | 7080  | 7158  | 7035  | 6986  | 6940  | 6912  |
|                                | $v_t$ (ms <sup>-2</sup> ) | 3950 | 3990  | 4041  | 4087  | 4133  | 4062  | 4033  | 4007  | 3991  |
|                                | $v_m$ (ms <sup>-2</sup> ) | 4156 | 4197  | 4250  | 4299  | 4348  | 4272  | 4243  | 4215  | 4198  |
| Elastic Constant               | $B$ (GPa)                 | 153  | 156   | 157   | 158   | 160   | 164   | 165   | 166   | 167   |
|                                | $G$ (Gpa)                 | 84   | 84    | 87    | 88    | 89    | 91    | 92    | 93    | 95    |
|                                | $E$ (GPa)                 | 216  | 220   | 223   | 226   | 229   | 234   | 237   | 239   | 241   |
| Pugh ratio (B/G)               |                           | 1.84 | 1.83  | 1.82  | 1.80  | 1.79  | 1.81  | 1.79  | 1.78  | 1.76  |
| $\sigma$                       |                           | 0.29 | 0.29  | 0.29  | 0.29  | 0.28  | 0.29  | 0.28  | 0.28  | 0.28  |
| Zero Porosity Elastic Constant | $E_o$ (GPa)               | 261  | 266   | 280   | 291   | 300   | 298   | 310   | 322   | 340   |
|                                | $G_o$ (Gpa)               | 100  | 102   | 107   | 111   | 115   | 114   | 119   | 124   | 131   |
|                                | $B_o$ (GPa)               | 226  | 230   | 238   | 244   | 250   | 252   | 259   | 265   | 275   |
| $\sigma_0$                     |                           | 0.31 | 0.31  | 0.30  | 0.30  | 0.30  | 0.30  | 0.30  | 0.29  | 0.29  |
| $B_o/G_o$                      |                           | 2.26 | 2.25  | 2.22  | 2.19  | 2.16  | 2.20  | 2.16  | 2.14  | 2.09  |
| $\theta_D$ (K)                 |                           | 593  | 599   | 606   | 612   | 618   | 610   | 605   | 601   | 598   |
| $K_{min}$                      |                           | 1.31 | 1.33  | 1.34  | 1.36  | 1.37  | 1.35  | 1.34  | 1.33  | 1.32  |
